# Supplementary material for: Achieving long lifetime of room-temperature phosphorescence via constructing vitrimer networks
Source: Royal Society of Chemistry journal article supplement (doi:10.1039/d2qm00003b), 2022-01-01
Supplement: d2qm00003b1.pdf [file d2qm00003b1.pdf]

## Supporting Information

### Achieving Long Lifetime of Room-Temperature Phosphorescence via Constructing Vitrimer Networks

Yulei Gao<sup>a</sup>, Zhou Deng<sup>a</sup>, Fenfen Wang<sup>a,\*</sup> and Pingchuan Sun<sup>a,\*</sup>

Key Laboratory of Functional Polymer Materials of Ministry of Education and College of Chemistry,  
State Key Laboratory of Medicinal Chemical Biology, Nankai University, Tianjin 300071, P. R.  
China.

E-mail: wff@mail.nankai.edu.cn; spclbh@nankai.edu.cn

## Table of Contents

1. Experimental details
2. Supporting Figures and Tables
3. References

## 1. Experimental details

### 1.1. Synthetic routes of BF<sub>2</sub>epo and BF<sub>2</sub>L1.

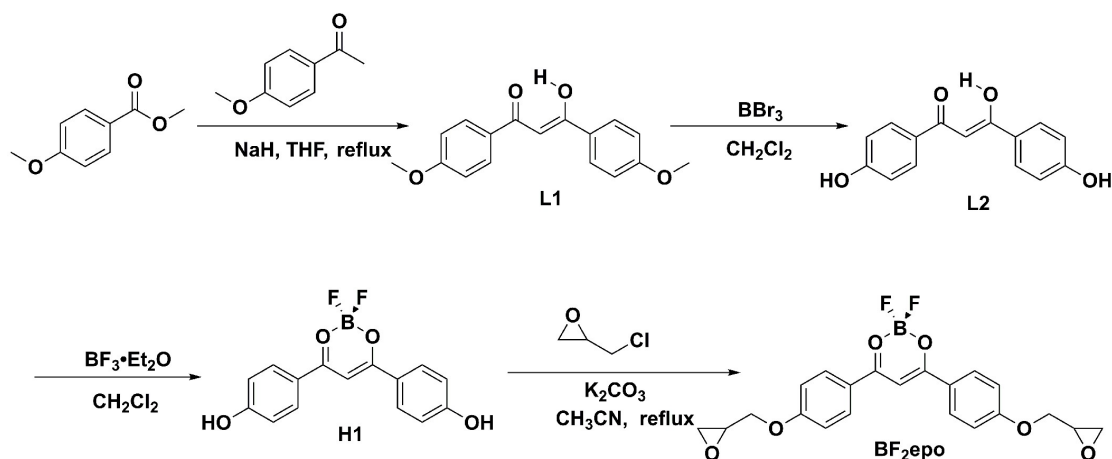

**Scheme S1.** Synthetic route of BF<sub>2</sub>epo.

Compound 1,3-bis(4-methoxyphenyl)propane-1,3-dione (L1) was synthesized according to the method which has been reported in the earlier literature with the same structure.<sup>1</sup>

**Synthesis of 1,3-bis(4-hydroxyphenyl)propane-1,3-dione (L2):** To a solution of L1 (3.46 g, 12.2 mmol) in CH<sub>2</sub>Cl<sub>2</sub> (50 mL) cooled with an ice-salt bath was added dropwise a 1 M CH<sub>2</sub>Cl<sub>2</sub> solution of

$\text{BBr}_3$  (36.5 mL, 36.5 mmol). This solution was stirred for 30 min at ice-salt bath, 30 min at 0 °C, 5 h at room temperature, and afterward quenched by dropwise addition of  $\text{H}_2\text{O}$  (50 mL). Add 2 M NaOH (50 mL). The aqueous was adjusted to pH = 6 with conc. HCl (aq) caused the formation of a yellow precipitate which was then extracted with ethyl acetate 3 times, and the combined organic phase was washed with brine (20 mL), dried ( $\text{MgSO}_4$ ), filtrated and concentrated under vacuum to afford L2 as a yellow solid (2.77 g, 88.8% yield).  $^1\text{H}$  NMR (400 MHz, in Acetone- $d_6$ ):  $\delta$  17.58 (s, 0.9H), 9.12 (s, 2H), 8.04 (d, 4H), 7.04 (s, 1H), 6.97 (d, 4H), 4.60 (s, 0.1H).

**Synthesis of difluoroboron-1,3-bis(4-hydroxyphenyl)propane-1,3-dione (H1):** To a solution of L2 (2.56 g, 10.0 mmol) in  $\text{CH}_2\text{Cl}_2$  (50 mL) added dropwise  $\text{BF}_3 \cdot \text{Et}_2\text{O}$  (2.5 mL, 20.0 mmol) by a syringe. The mixture was heated slowly to 60 °C for 5.5 h under nitrogen atmosphere. After cooled to room temperature, the mixture was concentrated under reduced pressure. The desired pure product was obtained by recrystallization from ethyl acetate as a yellow solid (2.18 g, 71.7% yield).  $^1\text{H}$  NMR (400 MHz, in Acetone- $d_6$ ):  $\delta$  9.69 (s, 1.5H), 8.25 (d, 4H), 7.51 (s, 1H), 7.06 (d, 4H).

**Synthesis of difluoroboron-1,3-bis(4-(oxiran-2-ylmethoxy)phenyl)propane-1,3-dione ( $\text{BF}_2\text{epo}$ ):** H1 (1.0 g, 3.29 mmol), epichlorohydrin (12.17g, 131.6 mmol) and potassium carbonate (1.82 g, 13.16 mmol) were added into 20 mL of acetonitrile and the mixture was heated to 120 °C for 16 h. After cooled to room temperature, the mixture was filtrated, washed with  $\text{CH}_2\text{Cl}_2$  ( $3 \times 10$  mL) and concentrated under vacuum to yield the  $\text{BF}_2\text{epo}$  (0.54 g, 39.5% yield).  $^1\text{H}$  NMR (400 MHz, in  $\text{CDCl}_3$ ):  $\delta$  8.12 (d, 2H), 7.04 (d, 2H), 7.01 (s, 0.5H), 4.39 (dd, 1H), 4.04 (dd, 1H), 3.40 (dt, 1H), 2.97 – 2.92 (m, 1H), 2.79 (dd, 1H).  $^{13}\text{C}$  NMR (101 MHz, in  $\text{CDCl}_3$ ,  $\delta$  ppm): 181.02, 164.24, 131.41, 129.27, 125.11, 115.25, 114.70, 91.85, 69.32, 49.90, 44.67.

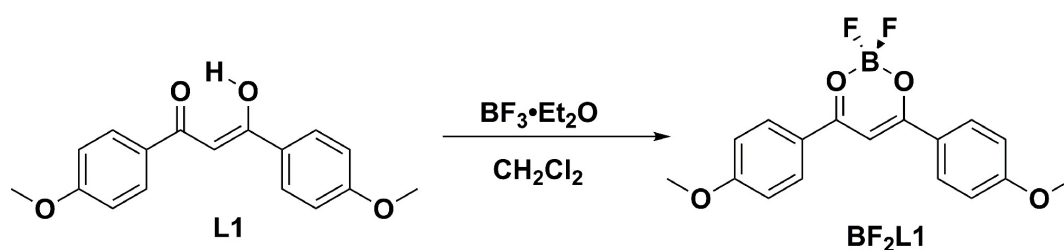

**Scheme S2.** Synthetic route of  $\text{BF}_2\text{L1}$ .

**Synthesis of difluoroboron-1,3-bis(4-methoxyphenyl)propane-1,3-dione ( $\text{BF}_2\text{L1}$ ):** To a solution of L1 (0.8 g, 2.81 mmol) in  $\text{CH}_2\text{Cl}_2$  (30 mL) was added dropwise  $\text{BF}_3 \cdot \text{Et}_2\text{O}$  (0.5 mL, 4.22 mmol) by

a syringe. The mixture was heated slowly to 60 °C for 5 h under nitrogen atmosphere and was monitored by TLC at the same time (EA: n-hexane = 1:3, v:v). After cooled to room temperature, the mixture was concentrated under vacuum to produce a yellow solid. The desire pure product was obtained by washing with ethyl acetate 2-3 times (0.74 g, 80% yield). <sup>1</sup>H NMR (400 MHz, in DMSO-d<sub>6</sub>): δ 8.36 (d, 4H), 7.75 (s, 1H), 7.19 (d, 4H), 3.93 (s, 6H).

## 1.2. Preparation of ER/BF<sub>2</sub>epo vitrimer.

The hybrid vitrimers were synthesized via curing DGEBA, sebacic acid (SA) and BF<sub>2</sub>epo with triazabicyclodecene (TBD) as the transesterification catalyst, obtaining a crosslinked epoxy resin labeled as ER/BF<sub>2</sub>epo-x (x denotes the mole percentage of BF<sub>2</sub>epo in total epoxy monomers).

**Table S1.** Formulations and gel contents of ER/BF<sub>2</sub>epo vitrimer.

| Sample                     | DGEBA<br>[g] | BF <sub>2</sub> epo<br>[g] | SA<br>[g] | TBD<br>[g] | Gel content<br>[%] |
|----------------------------|--------------|----------------------------|-----------|------------|--------------------|
| ER/BF <sub>2</sub> epo-0   | 1.01         | 0                          | 0.6       | 0.041      | 96.0 ± 0.5         |
| ER/BF <sub>2</sub> epo-1   | 1.00         | 0.012                      | 0.6       | 0.041      | 94.6 ± 0.9         |
| ER/BF <sub>2</sub> epo-10  | 0.91         | 0.123                      | 0.6       | 0.041      | 95.5 ± 1.1         |
| ER/BF <sub>2</sub> epo-20  | 0.81         | 0.247                      | 0.6       | 0.041      | 95.8 ± 0.7         |
| ER/BF <sub>2</sub> epo-50  | 0.51         | 0.617                      | 0.6       | 0.041      | 94.1 ± 0.4         |
| ER/BF <sub>2</sub> epo-100 | 0            | 1.235                      | 0.6       | 0.041      | 93.7 ± 0.8         |

## 2. Supporting Figures and Tables

### 2.1. Characterization of monomers.

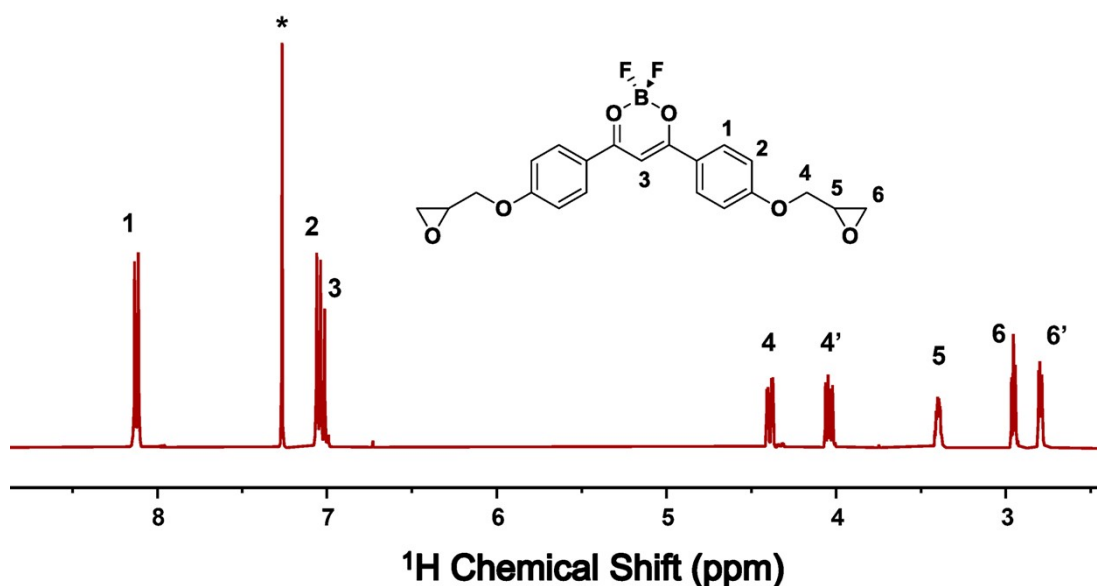

**Figure S1.** The  $^1\text{H}$  NMR spectrum of compound  $\text{BF}_2\text{epo}$  in  $\text{CDCl}_3$ .

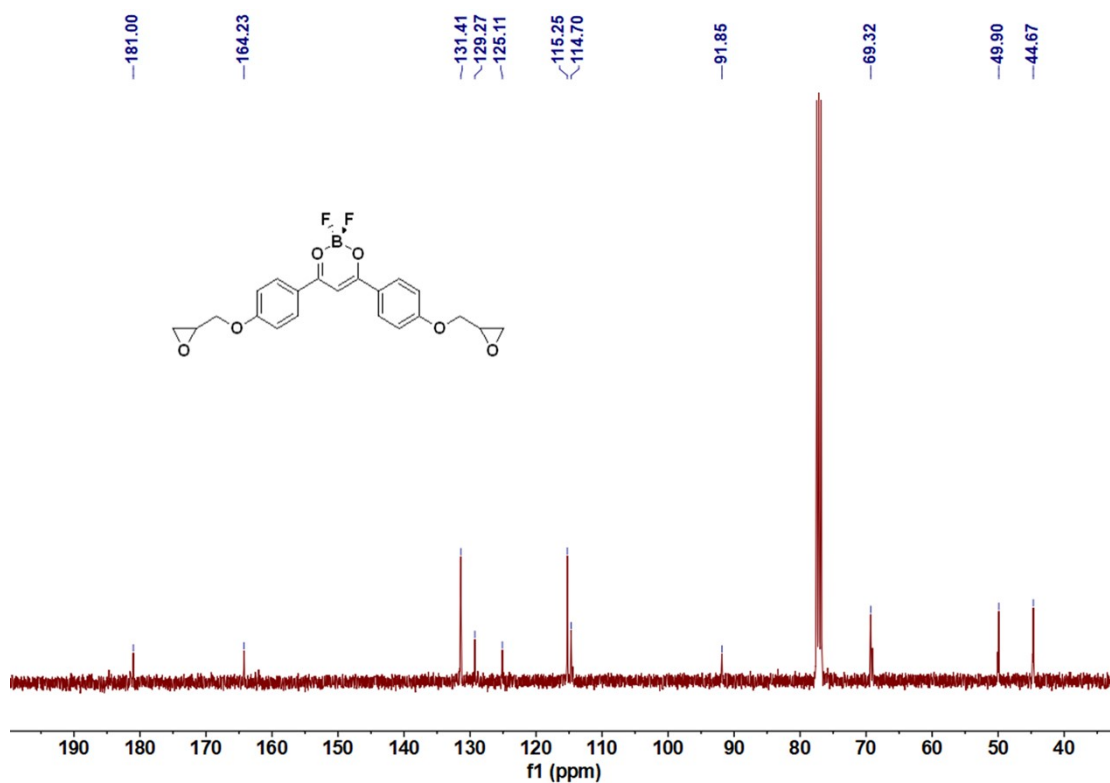

**Figure S2.** The  $^{13}\text{C}$  NMR spectrum of compound  $\text{BF}_2\text{epo}$  in  $\text{CDCl}_3$ .

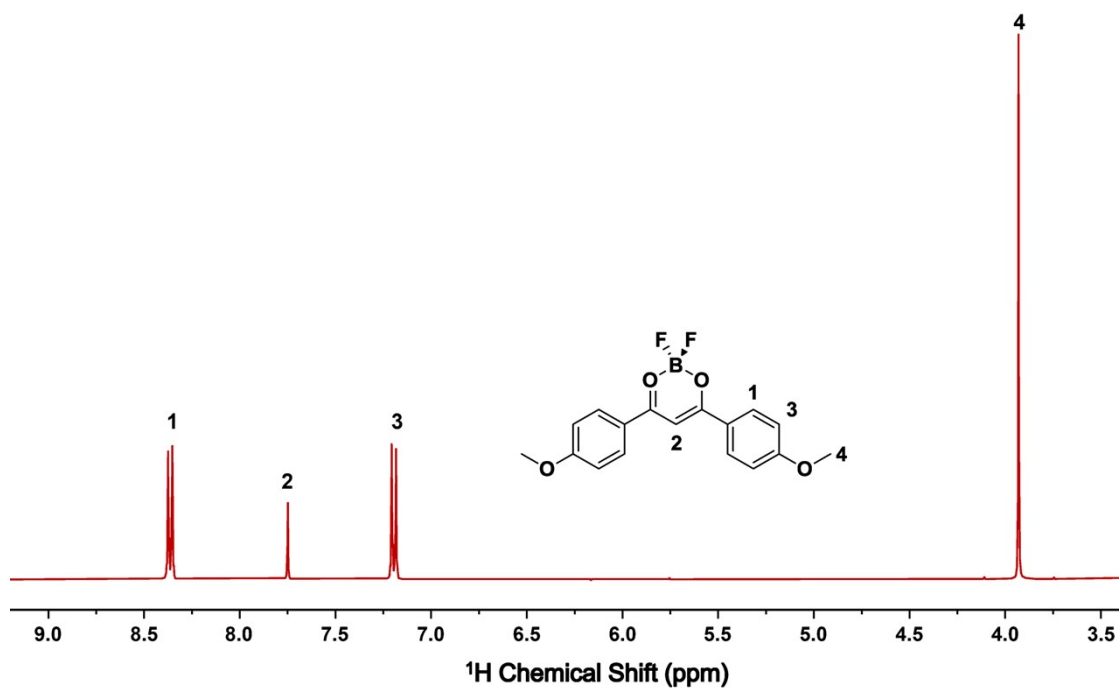

**Figure S3.** The  $^1\text{H}$  NMR spectrum of compound  $\text{BF}_2\text{L1}$  in  $\text{DMSO-d}_6$ .

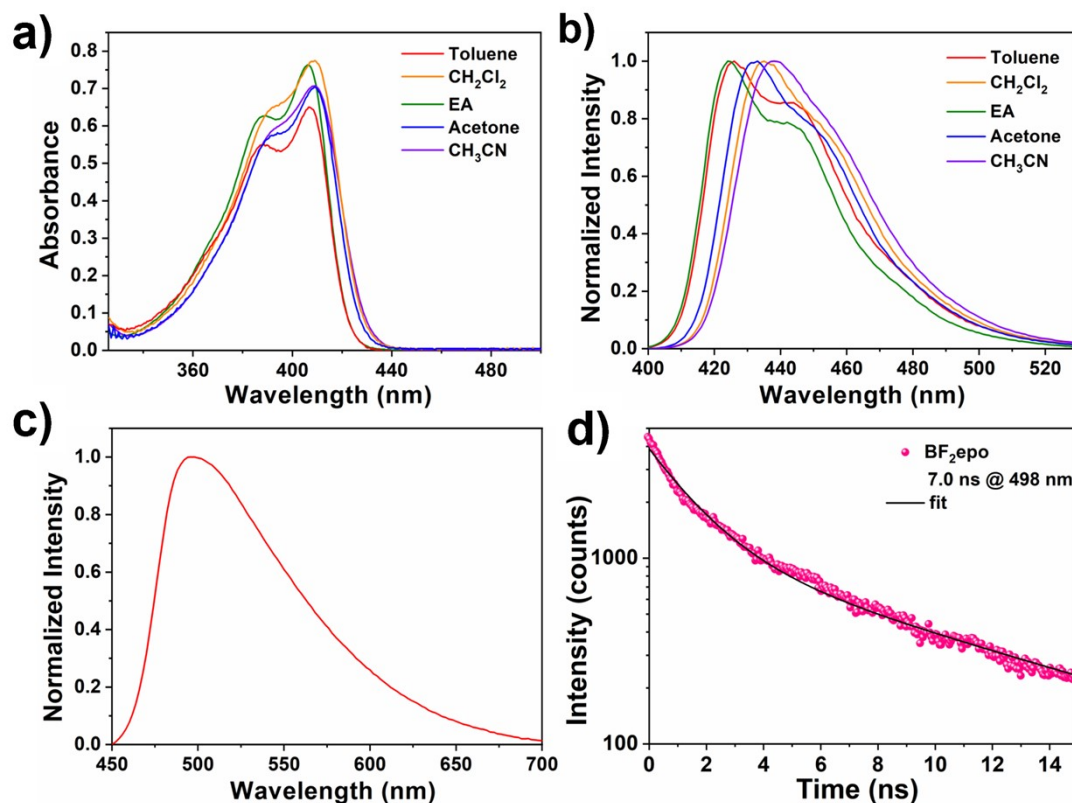

**Figure S4.** (a) UV-vis absorption and (b) normalized fluorescence emission spectra of BF<sub>2</sub>epo in various solvents with 409 nm excitation (293 K, 10 μM). (c) Normalized fluorescence emission spectrum and (d) time-resolved photoluminescence decay of BF<sub>2</sub>epo in the solid state with 369 nm excitation.

Figure S4 shows the UV-vis absorption and fluorescence emission spectra of BF<sub>2</sub>epo in different solvents with varied polarities and the detailed data were listed in Table S2. UV-vis absorption spectra show that BF<sub>2</sub>epo has intense absorption peaks over 400 nm and varying the polarity of the solvent has little effect on the maximum absorption wavelength. BF<sub>2</sub>epo has a high fluorescence quantum yield in all solvents, manifesting a strong fluorescence emission under excitation at the maximum absorption wavelength (409 nm) and the emission red-shifted with increasing solvent polarities, which point to charge-transfer excited-state transitions. Exceptionally, an abnormal red-shifted emission was observed in CH<sub>2</sub>Cl<sub>2</sub>, which is possibly caused by the interaction between the π-electrons of the BF<sub>2</sub>epo molecules and the surrounding solvent.<sup>2</sup> Besides, owing to the molecular interaction, the maximum emission wavelength red-shifted to 498 nm in the solid state with a fluorescence lifetime of 7.0 ns.

**Table S2.** Photophysical data of BF<sub>2</sub>epo in different solvents.

| Solvent                         | $\lambda_{\text{abs}}$<br>[nm] | $\epsilon$<br>[M <sup>-1</sup> cm <sup>-1</sup> ] | $\lambda_{\text{em}}$<br>[nm] | $\Phi_f^a$ | $\tau_f^b$<br>[ns] | $\tau_{\text{rad}}^c$<br>[ns] | $k_r^d$<br>[10 <sup>9</sup> s <sup>-1</sup> ] | $k_{\text{nr}}^e$<br>[10 <sup>9</sup> s <sup>-1</sup> ] |
|---------------------------------|--------------------------------|---------------------------------------------------|-------------------------------|------------|--------------------|-------------------------------|-----------------------------------------------|---------------------------------------------------------|
| Toluene                         | 407                            | 55400                                             | 427                           | 0.67       | 2.04               | 3.04                          | 0.33                                          | 0.16                                                    |
| CH <sub>2</sub> Cl <sub>2</sub> | 409                            | 80000                                             | 436                           | 0.91       | 1.96               | 2.15                          | 0.46                                          | 0.05                                                    |
| EA <sup>f</sup>                 | 406                            | 77400                                             | 410                           | 0.85       | 2.00               | 2.35                          | 0.43                                          | 0.08                                                    |
| Acetone                         | 409                            | 72600                                             | 432                           | 0.72       | 2.51               | 3.49                          | 0.29                                          | 0.11                                                    |
| CH <sub>3</sub> CN              | 409                            | 69800                                             | 438                           | 0.74       | 2.13               | 2.88                          | 0.35                                          | 0.12                                                    |

<sup>a</sup> Fluorescence quantum yield versus 9,10-diphenylanthracene in benzene ( $\Phi_f = 0.85$ ,  $\lambda_{\text{ex}} = 390$  nm). <sup>b</sup> Fluorescence lifetime. <sup>c</sup> Radiative lifetime:  $\tau_{\text{rad}} = \tau_f / \Phi_f$ . <sup>d</sup> Radiative rate constant:  $k_r = \Phi_f / \tau_f$ ; <sup>e</sup> Nonradiative rate constant:  $k_{\text{nr}} = (1 - \Phi_f) / \tau_f$ . <sup>f</sup> Ethyl acetate.

## 2.2. Characterization of ER/BF<sub>2</sub>epo vitrimer.

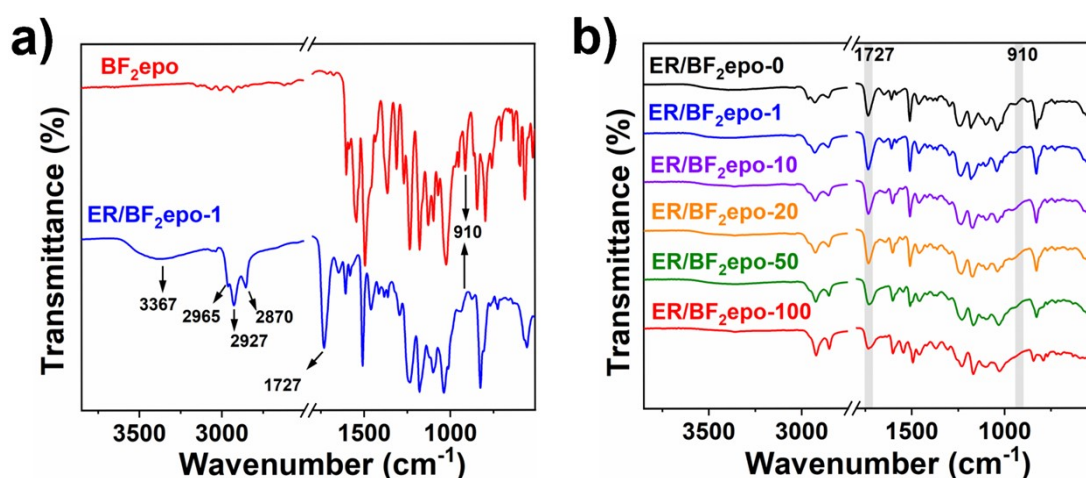

**Figure S5.** (a) FT-IR spectra of BF<sub>2</sub>epo and ER/BF<sub>2</sub>epo-1 vitrimer. (b) FT-IR spectra of ER/BF<sub>2</sub>epo vitrimer with different contents of BF<sub>2</sub>epo.

Figure S5 shows the spectra of ER/BF<sub>2</sub>epo vitrimers. In the spectrum of BF<sub>2</sub>epo, a distinct peak at 910 cm<sup>-1</sup> was observed which was assigned to the typical absorption of the epoxy group. Whilst in the case of ER/BF<sub>2</sub>epo-1 vitrimer the epoxy group peak disappeared with the vibration absorption peaks of -OH (3367 cm<sup>-1</sup>) and ester bonds (1727 cm<sup>-1</sup>) emerged, the stretching vibration peaks of methyl groups and methylene groups (2965, 2927 and 2870 cm<sup>-1</sup>) increased. Other ER/BF<sub>2</sub>epo vitrimers also showed the same characteristics.

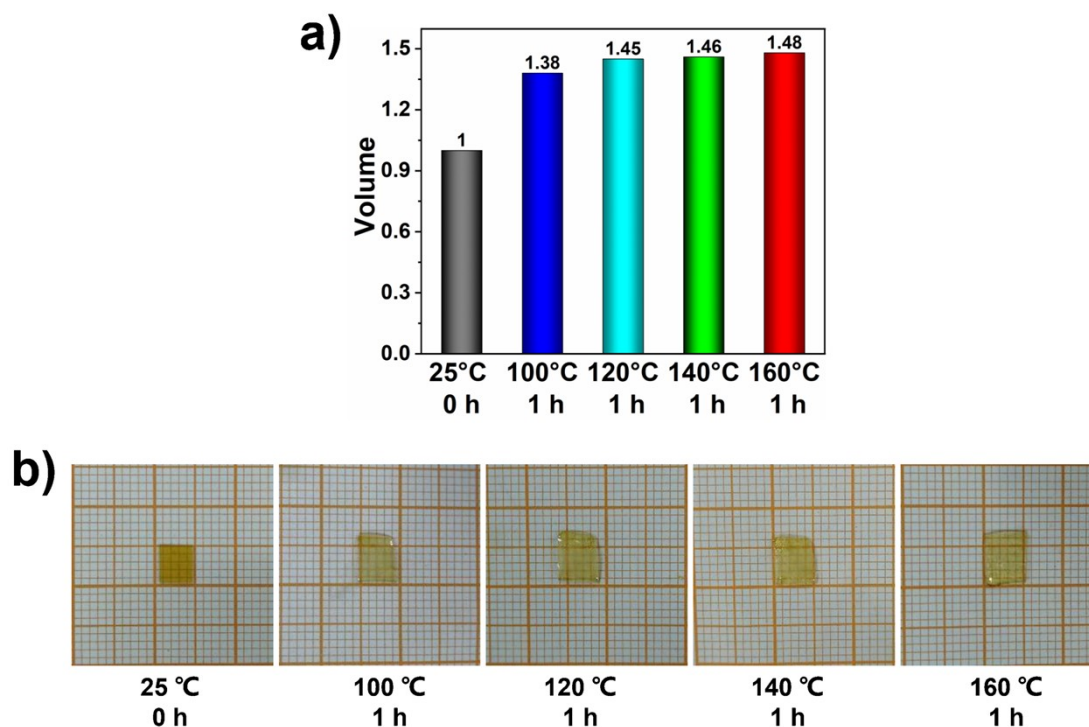

**Figure S6.** (a) Volume changes and (b) photographs of ER/BF<sub>2</sub>epo-10 vitrimer film after swelled in DMAc at different temperatures.

To further verify that ER/BF<sub>2</sub>epo vitrimer has successfully cured into a chemically crosslinked network, the swelling experiments were conducted using N, N-dimethylacetamide (DMAc) as the solvent (Figure S6). The volume of the film increased by 45% after 1 h at 120 °C and increased slowly after swelling for 1 h at 140 °C and 160 °C, which showed the sample had basically reached swelling equilibrium at 120 °C. It is worth noting that the film was merely swelled during the whole process without dissolving at elevated temperatures, revealing the formation of crosslinking structure.

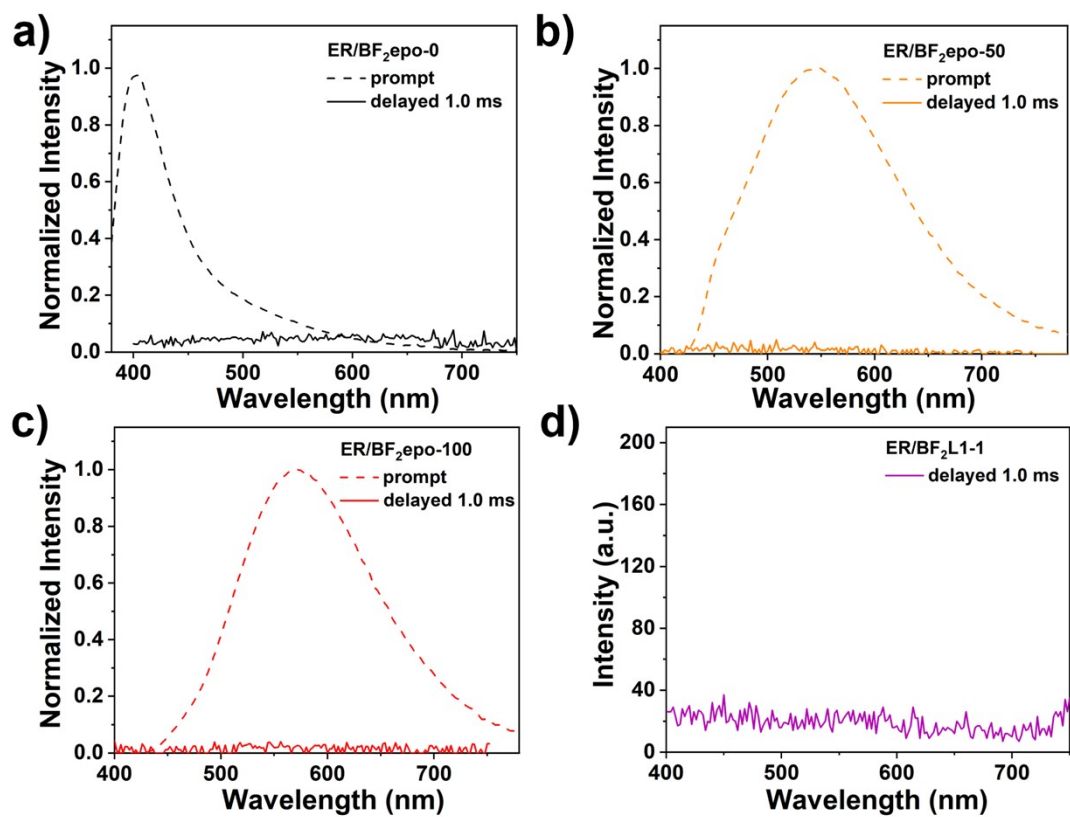

**Figure S7.** Prompt and delayed PL emission spectra of (a) ER/BF<sub>2</sub>epo-0, (b) ER/BF<sub>2</sub>epo-50 and (c) ER/BF<sub>2</sub>epo-100 samples. (d) Delayed emission spectra of ER/BF<sub>2</sub>L1-1 vitrimer.

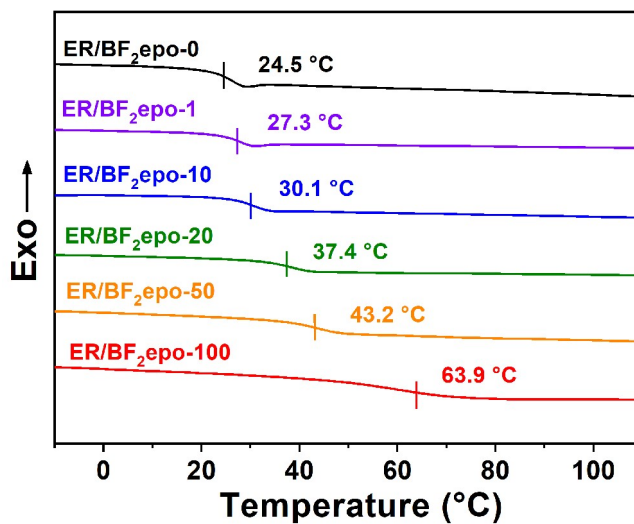

**Figure S8.** DSC curves. The peak temperatures are labeled on the curves.



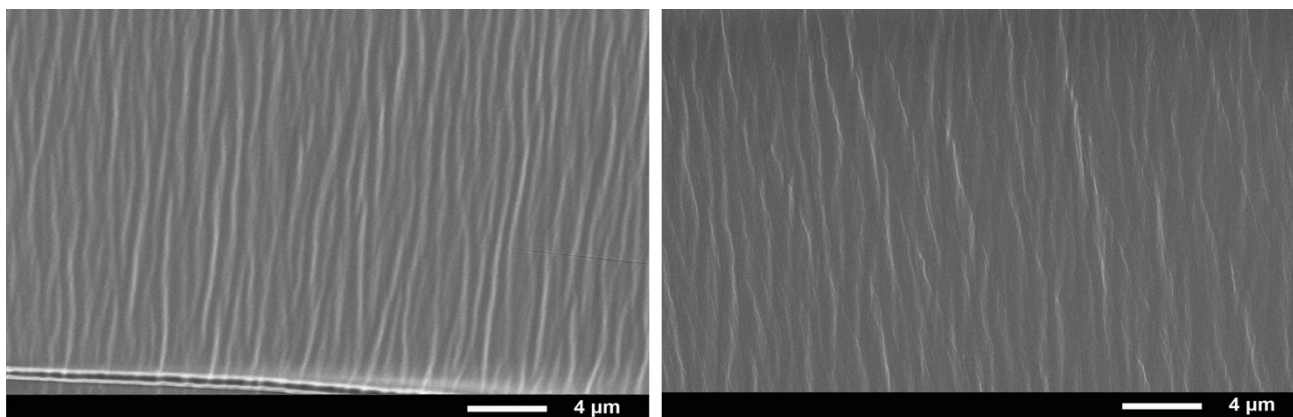

**Figure S9.** SEM micrographs of fracture surfaces of ER/BF<sub>2</sub>epo-0 vitrimer (left) and ER/BF<sub>2</sub>epo-10 vitrimer (right).

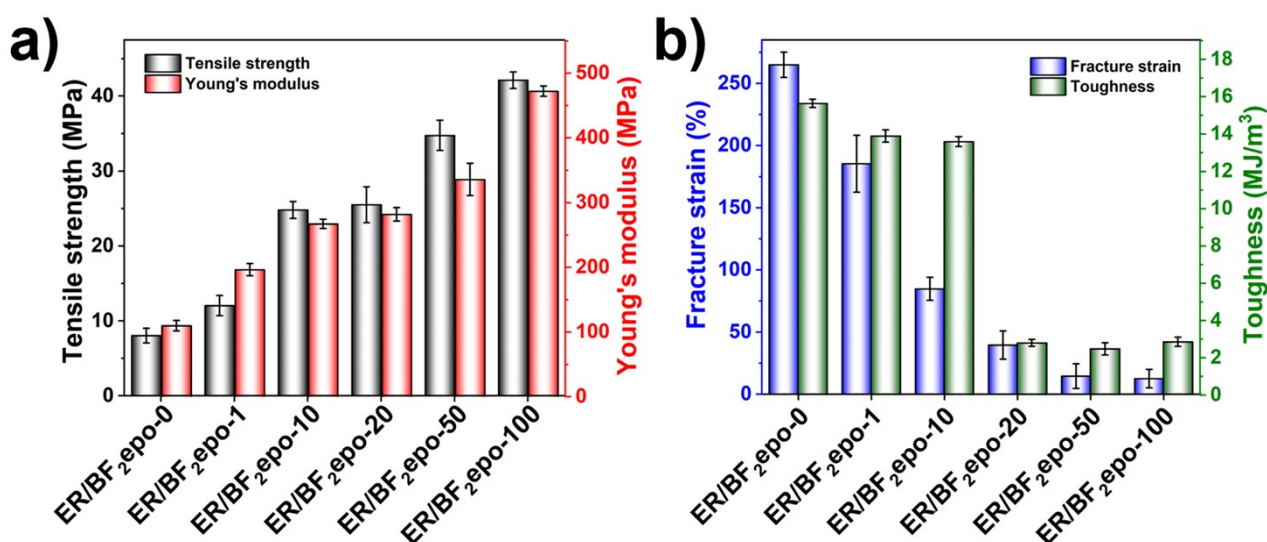

**Figure S10.** (a) The corresponding tensile strength and Young's modulus, and (b) the corresponding fracture strain and toughness of ER/BF<sub>2</sub>epo vitrimer.

### 3. References

1. J. L. Howard, Y. Sagatov, L. Repusseau, C. Schotten and D. L. Browne, Controlling reactivity through liquid assisted grinding: the curious case of mechanochemical fluorination, *Green Chem.*, 2017, **19**, 2798-2802.
2. H. Zhang, P. Z. Chen, L. Y. Niu and Q. Z. Yang, A difluoroboron  $\beta$ -diketonate-based luminescent material with tunable solid-state emission and thermally activated delayed fluorescence, *Mater. Chem. Front.*, 2020, **4**, 285-291.
